# Supplementary material for: SH3 domain regulation of RhoGAP activity: Crosstalk between p120RasGAP and DLC1 RhoGAP
Source: PubMed Central journal article supplement (PMC9378701; doi:10.1038/s41467-022-32541-4), 2022-08-15
Supplement: 41467_2022_32541_MOESM2_ESM.pdf [file 41467_2022_32541_MOESM2_ESM.pdf]

## Reporting Summary

Nature Portfolio wishes to improve the reproducibility of the work that we publish. This form provides structure for consistency and transparency in reporting. For further information on Nature Portfolio policies, see our [Editorial Policies](#) and the [Editorial Policy Checklist](#).

### Statistics

For all statistical analyses, confirm that the following items are present in the figure legend, table legend, main text, or Methods section.

- |                                     |                                                                                                                                                                                                                                                                                                |
|-------------------------------------|------------------------------------------------------------------------------------------------------------------------------------------------------------------------------------------------------------------------------------------------------------------------------------------------|
| n/a                                 | Confirmed                                                                                                                                                                                                                                                                                      |
| <input type="checkbox"/>            | <input checked="" type="checkbox"/> The exact sample size ( $n$ ) for each experimental group/condition, given as a discrete number and unit of measurement                                                                                                                                    |
| <input type="checkbox"/>            | <input checked="" type="checkbox"/> A statement on whether measurements were taken from distinct samples or whether the same sample was measured repeatedly                                                                                                                                    |
| <input type="checkbox"/>            | <input checked="" type="checkbox"/> The statistical test(s) used AND whether they are one- or two-sided<br><i>Only common tests should be described solely by name; describe more complex techniques in the Methods section.</i>                                                               |
| <input type="checkbox"/>            | <input checked="" type="checkbox"/> A description of all covariates tested                                                                                                                                                                                                                     |
| <input checked="" type="checkbox"/> | <input type="checkbox"/> A description of any assumptions or corrections, such as tests of normality and adjustment for multiple comparisons                                                                                                                                                   |
| <input type="checkbox"/>            | <input checked="" type="checkbox"/> A full description of the statistical parameters including central tendency (e.g. means) or other basic estimates (e.g. regression coefficient) AND variation (e.g. standard deviation) or associated estimates of uncertainty (e.g. confidence intervals) |
| <input type="checkbox"/>            | <input checked="" type="checkbox"/> For null hypothesis testing, the test statistic (e.g. $F$ , $t$ , $r$ ) with confidence intervals, effect sizes, degrees of freedom and $P$ value noted<br><i>Give <math>P</math> values as exact values whenever suitable.</i>                            |
| <input checked="" type="checkbox"/> | <input type="checkbox"/> For Bayesian analysis, information on the choice of priors and Markov chain Monte Carlo settings                                                                                                                                                                      |
| <input checked="" type="checkbox"/> | <input type="checkbox"/> For hierarchical and complex designs, identification of the appropriate level for tests and full reporting of outcomes                                                                                                                                                |
| <input checked="" type="checkbox"/> | <input type="checkbox"/> Estimates of effect sizes (e.g. Cohen's $d$ , Pearson's $r$ ), indicating how they were calculated                                                                                                                                                                    |

*Our web collection on [statistics for biologists](#) contains articles on many of the points above.*

### Software and code

Policy information about [availability of computer code](#)

Data collection

Data analysis

For manuscripts utilizing custom algorithms or software that are central to the research but not yet described in published literature, software must be made available to editors and reviewers. We strongly encourage code deposition in a community repository (e.g. GitHub). See the Nature Portfolio [guidelines for submitting code & software](#) for further information.

### Data

Policy information about [availability of data](#)

All manuscripts must include a [data availability statement](#). This statement should provide the following information, where applicable:

- Accession codes, unique identifiers, or web links for publicly available datasets
- A description of any restrictions on data availability
- For clinical datasets or third party data, please ensure that the statement adheres to our [policy](#)

Coordinates and structure factors have been deposited in the Protein Data Bank under accession code 7TPB (<http://doi.org/10.2210/pdb7TPB/pdb>). X-ray diffraction images are available online at SBGrid Data Bank: doi:10.15785/SBGRID/876. All data generated or analysed during this study are included in this published article (and its Supplementary Information files). The source data underlying Fig. 4 and Fig. 5 are provided as a Source Data file. Previously determined structures used in our analysis were obtained from the Protein Data Bank: 10.2210/pdb3kuq/pdb (DLC1 RhoGAP domain), 10.2210/pdb1tx4/pdb (Rho/RhoGAP complex), 10.2210/pdb2j05/pdb (RasGAP SH3), 10.2210/pdb2j06/pdb (RasGAP SH3), 10.2210/pdb4fss/pdb (RasGAP SH3), 10.2210/pdb2gqi/pdb (RasGAP SH3),

10.2210/pdb2m51/pdb (RasGAP SH3), 10.2210/pdb5irc/pdb (RhoA/p190A RhoGAP domain complex), 10.2210/pdb1cka/pdb (C-Crk SH3 domain), 10.2210/pdb1k4u/pdb (p67phox SH3 domain/p47phox tail complex), 10.2210/pdb1efn/pdb (Fyn SH3 domain/HIV-1 Nef complex), 10.2210/pdb2jt4/pdb (Sla1 SH3/Ubiquitin complex), 10.2210/pdb1ycs/pdb (P53-53BP2 complex), 10.2210/pdb1m27/pdb (SAP/FynSH3/SLAM ternary complex), 10.2210/pdb2dx1/pdb (Asef RhoGEF). The AlphaFold model of DLC1 (AF-Q96QB1-F1-model\_v2.pdb) was obtained from the AlphaFold Structure Database: [https://alphafold.ebi.ac.uk/files/AF-Q96QB1-F1-model\\_v2.pdb](https://alphafold.ebi.ac.uk/files/AF-Q96QB1-F1-model_v2.pdb).

## Human research participants

Policy information about [studies involving human research participants and Sex and Gender in Research](#).

|                             |     |
|-----------------------------|-----|
| Reporting on sex and gender | N/A |
| Population characteristics  | N/A |
| Recruitment                 | N/A |
| Ethics oversight            | N/A |

Note that full information on the approval of the study protocol must also be provided in the manuscript.

## Field-specific reporting

Please select the one below that is the best fit for your research. If you are not sure, read the appropriate sections before making your selection.

Life sciences  Behavioural & social sciences  Ecological, evolutionary & environmental sciences

For a reference copy of the document with all sections, see [nature.com/documents/nr-reporting-summary-flat.pdf](https://www.nature.com/documents/nr-reporting-summary-flat.pdf)

## Life sciences study design

All studies must disclose on these points even when the disclosure is negative.

|                 |                                                                                                                                                                                                                                                                                                               |
|-----------------|---------------------------------------------------------------------------------------------------------------------------------------------------------------------------------------------------------------------------------------------------------------------------------------------------------------|
| Sample size     | The sample size was chosen to ensure reproducibility. All measurements were reproducible and each measurement is plotted in the figures. At least 3 measurements were collected, which is standard in the field.                                                                                              |
| Data exclusions | No data were excluded.                                                                                                                                                                                                                                                                                        |
| Replication     | All data was reproducible over independent experiments, at least three measurements per condition. Reproducibility was verified by replication in independent samples on independent days with independent measurements. The number of independent samples for each dataset is reported in the Figure legend. |
| Randomization   | No randomization was performed since randomization is not appropriate for the experiments performed here.                                                                                                                                                                                                     |
| Blinding        | Experiments were not blinded as this was not appropriate for biochemical assays with purified proteins. The results are quantitative from endpoint assays read as Absorbance on a plate reader.                                                                                                               |

## Reporting for specific materials, systems and methods

We require information from authors about some types of materials, experimental systems and methods used in many studies. Here, indicate whether each material, system or method listed is relevant to your study. If you are not sure if a list item applies to your research, read the appropriate section before selecting a response.

### Materials & experimental systems

|                                     |                                                        |
|-------------------------------------|--------------------------------------------------------|
| n/a                                 | Involved in the study                                  |
| <input checked="" type="checkbox"/> | <input type="checkbox"/> Antibodies                    |
| <input checked="" type="checkbox"/> | <input type="checkbox"/> Eukaryotic cell lines         |
| <input checked="" type="checkbox"/> | <input type="checkbox"/> Palaeontology and archaeology |
| <input checked="" type="checkbox"/> | <input type="checkbox"/> Animals and other organisms   |
| <input checked="" type="checkbox"/> | <input type="checkbox"/> Clinical data                 |
| <input checked="" type="checkbox"/> | <input type="checkbox"/> Dual use research of concern  |

### Methods

|                                     |                                                 |
|-------------------------------------|-------------------------------------------------|
| n/a                                 | Involved in the study                           |
| <input checked="" type="checkbox"/> | <input type="checkbox"/> ChIP-seq               |
| <input checked="" type="checkbox"/> | <input type="checkbox"/> Flow cytometry         |
| <input checked="" type="checkbox"/> | <input type="checkbox"/> MRI-based neuroimaging |
